# Supplementary material for: Study investigating the generalisability of a COPD trial based in primary care (Salford Lung Study) and the presence of a Hawthorne effect
Source: PubMed Central journal article supplement — BMJ Open Respir Res. 2018 Oct 25;5(1):e000339. doi: 10.1136/bmjresp-2018-000339 (PMC6203022; doi:10.1136/bmjresp-2018-000339), 2018-10-25
Supplement: bmjresp-2018-000339supp002.pdf [file bmjresp-2018-000339supp002.pdf]

**ISAC APPLICATION FORM**  
**PROTOCOLS FOR RESEARCH USING THE CLINICAL PRACTICE RESEARCH DATALINK (CPRD)**

|                                                                                                                                                                                                                                                                                                                                                                                                                                                                                                                                                                                                                                                                                                                                                                                                                                                                                                                                                                                                                                                                                                                                                                                                                                                        |                                                                                                                                          |                                                                                                       |                                                             |                                                                     |                               |                                                          |                                 |
|--------------------------------------------------------------------------------------------------------------------------------------------------------------------------------------------------------------------------------------------------------------------------------------------------------------------------------------------------------------------------------------------------------------------------------------------------------------------------------------------------------------------------------------------------------------------------------------------------------------------------------------------------------------------------------------------------------------------------------------------------------------------------------------------------------------------------------------------------------------------------------------------------------------------------------------------------------------------------------------------------------------------------------------------------------------------------------------------------------------------------------------------------------------------------------------------------------------------------------------------------------|------------------------------------------------------------------------------------------------------------------------------------------|-------------------------------------------------------------------------------------------------------|-------------------------------------------------------------|---------------------------------------------------------------------|-------------------------------|----------------------------------------------------------|---------------------------------|
| ISAC use only:<br>Protocol Number .....<br>Date submitted .....                                                                                                                                                                                                                                                                                                                                                                                                                                                                                                                                                                                                                                                                                                                                                                                                                                                                                                                                                                                                                                                                                                                                                                                        | <b>IMPORTANT</b><br><b>If you have any queries, please contact ISAC Secretariat:</b><br><a href="mailto:ISAC@cprd.com">ISAC@cprd.com</a> |                                                                                                       |                                                             |                                                                     |                               |                                                          |                                 |
| 1. Study Title<br>PRJ2282: CHESS: CPRD-COPD Hawthorn Effect Study in Salford: A UK cohort study to characterise patients enrolled in the Salford Lung Study and to evaluate a potential Hawthorne effect                                                                                                                                                                                                                                                                                                                                                                                                                                                                                                                                                                                                                                                                                                                                                                                                                                                                                                                                                                                                                                               |                                                                                                                                          |                                                                                                       |                                                             |                                                                     |                               |                                                          |                                 |
| 2. Principal Investigator (full name, job title, organisation & e-mail address for correspondence regarding this protocol)<br>Matthew Sperrin, Lecturer in Health Data Science, University of Manchester, <a href="mailto:Matthew.sperrin@manchester.ac.uk">Matthew.sperrin@manchester.ac.uk</a>                                                                                                                                                                                                                                                                                                                                                                                                                                                                                                                                                                                                                                                                                                                                                                                                                                                                                                                                                       |                                                                                                                                          |                                                                                                       |                                                             |                                                                     |                               |                                                          |                                 |
| 3. Affiliation (full address)<br>Centre for Health Informatics, Institute of Population Health, University of Manchester,<br>Vaughan House, Portsmouth St, Manchester, M13 9PL                                                                                                                                                                                                                                                                                                                                                                                                                                                                                                                                                                                                                                                                                                                                                                                                                                                                                                                                                                                                                                                                         |                                                                                                                                          |                                                                                                       |                                                             |                                                                     |                               |                                                          |                                 |
| 4. Protocol's Author (if different from the principal investigator)<br>N/A                                                                                                                                                                                                                                                                                                                                                                                                                                                                                                                                                                                                                                                                                                                                                                                                                                                                                                                                                                                                                                                                                                                                                                             |                                                                                                                                          |                                                                                                       |                                                             |                                                                     |                               |                                                          |                                 |
| 5. List of all investigators/collaborators ( <i>please list the names, affiliations and e-mail addresses* of all collaborators, other than the principal investigator</i> )<br><br>Tjeerd Van Staa, Professor, University of Manchester, <a href="mailto:tjeerd.vanstaa@manchester.ac.uk">tjeerd.vanstaa@manchester.ac.uk</a><br>Kourtney Davis, Senior Director, Worldwide Epidemiology, GlaxoSmithKline, <a href="mailto:kourtney.i.davis@gsk.com">kourtney.i.davis@gsk.com</a><br>Jeanne Pimenta, Director, Worldwide Epidemiology, GlaxoSmithKline, <a href="mailto:jeanne.m.pimenta@gsk.com">jeanne.m.pimenta@gsk.com</a><br>Rachael Williams, CPRD, <a href="mailto:Rachael.Williams@mhra.gsi.gov.uk">Rachael.Williams@mhra.gsi.gov.uk</a><br><br><i>*Please note that your ISAC application form and protocol <b>must</b> be copied to all e-mail addresses listed above at the time of submission of your application to the ISAC mailbox. Failure to do so will result in delays in the processing of your application.</i>                                                                                                                                                                                                                   |                                                                                                                                          |                                                                                                       |                                                             |                                                                     |                               |                                                          |                                 |
| 6. Type of Institution (please tick one box below)<br><br><table style="width: 100%;"> <tr> <td>Academia <input checked="" type="checkbox"/></td> <td>Research Service Provider <input type="checkbox"/></td> <td>Pharmaceutical Industry <input type="checkbox"/></td> </tr> <tr> <td>NHS <input type="checkbox"/></td> <td>Government Departments <input type="checkbox"/></td> <td>Others <input type="checkbox"/></td> </tr> </table>                                                                                                                                                                                                                                                                                                                                                                                                                                                                                                                                                                                                                                                                                                                                                                                                              |                                                                                                                                          | Academia <input checked="" type="checkbox"/>                                                          | Research Service Provider <input type="checkbox"/>          | Pharmaceutical Industry <input type="checkbox"/>                    | NHS <input type="checkbox"/>  | Government Departments <input type="checkbox"/>          | Others <input type="checkbox"/> |
| Academia <input checked="" type="checkbox"/>                                                                                                                                                                                                                                                                                                                                                                                                                                                                                                                                                                                                                                                                                                                                                                                                                                                                                                                                                                                                                                                                                                                                                                                                           | Research Service Provider <input type="checkbox"/>                                                                                       | Pharmaceutical Industry <input type="checkbox"/>                                                      |                                                             |                                                                     |                               |                                                          |                                 |
| NHS <input type="checkbox"/>                                                                                                                                                                                                                                                                                                                                                                                                                                                                                                                                                                                                                                                                                                                                                                                                                                                                                                                                                                                                                                                                                                                                                                                                                           | Government Departments <input type="checkbox"/>                                                                                          | Others <input type="checkbox"/>                                                                       |                                                             |                                                                     |                               |                                                          |                                 |
| 7. Financial Sponsor of study<br><br><table style="width: 100%;"> <tr> <td>Pharmaceutical Industry (<i>please specify</i>) <input checked="" type="checkbox"/> GlaxoSmithKline</td> <td>Academia (<i>please specify</i>) <input type="checkbox"/></td> </tr> <tr> <td>Government / NHS (<i>please specify</i>) <input type="checkbox"/></td> <td>None <input type="checkbox"/></td> </tr> <tr> <td>Other (<i>please specify</i>) <input type="checkbox"/></td> <td></td> </tr> </table>                                                                                                                                                                                                                                                                                                                                                                                                                                                                                                                                                                                                                                                                                                                                                                |                                                                                                                                          | Pharmaceutical Industry ( <i>please specify</i> ) <input checked="" type="checkbox"/> GlaxoSmithKline | Academia ( <i>please specify</i> ) <input type="checkbox"/> | Government / NHS ( <i>please specify</i> ) <input type="checkbox"/> | None <input type="checkbox"/> | Other ( <i>please specify</i> ) <input type="checkbox"/> |                                 |
| Pharmaceutical Industry ( <i>please specify</i> ) <input checked="" type="checkbox"/> GlaxoSmithKline                                                                                                                                                                                                                                                                                                                                                                                                                                                                                                                                                                                                                                                                                                                                                                                                                                                                                                                                                                                                                                                                                                                                                  | Academia ( <i>please specify</i> ) <input type="checkbox"/>                                                                              |                                                                                                       |                                                             |                                                                     |                               |                                                          |                                 |
| Government / NHS ( <i>please specify</i> ) <input type="checkbox"/>                                                                                                                                                                                                                                                                                                                                                                                                                                                                                                                                                                                                                                                                                                                                                                                                                                                                                                                                                                                                                                                                                                                                                                                    | None <input type="checkbox"/>                                                                                                            |                                                                                                       |                                                             |                                                                     |                               |                                                          |                                 |
| Other ( <i>please specify</i> ) <input type="checkbox"/>                                                                                                                                                                                                                                                                                                                                                                                                                                                                                                                                                                                                                                                                                                                                                                                                                                                                                                                                                                                                                                                                                                                                                                                               |                                                                                                                                          |                                                                                                       |                                                             |                                                                     |                               |                                                          |                                 |
| 8. Data source ( <i>please tick one box below</i> )<br><br><table style="width: 100%;"> <tr> <td>Sponsor has on-line access <input checked="" type="checkbox"/></td> <td>Purchase of ad hoc dataset <input type="checkbox"/></td> </tr> <tr> <td>Commissioned study <input type="checkbox"/></td> <td></td> </tr> <tr> <td>Other <input type="checkbox"/> (<i>please specify</i>)</td> <td></td> </tr> </table>                                                                                                                                                                                                                                                                                                                                                                                                                                                                                                                                                                                                                                                                                                                                                                                                                                        |                                                                                                                                          | Sponsor has on-line access <input checked="" type="checkbox"/>                                        | Purchase of ad hoc dataset <input type="checkbox"/>         | Commissioned study <input type="checkbox"/>                         |                               | Other <input type="checkbox"/> ( <i>please specify</i> ) |                                 |
| Sponsor has on-line access <input checked="" type="checkbox"/>                                                                                                                                                                                                                                                                                                                                                                                                                                                                                                                                                                                                                                                                                                                                                                                                                                                                                                                                                                                                                                                                                                                                                                                         | Purchase of ad hoc dataset <input type="checkbox"/>                                                                                      |                                                                                                       |                                                             |                                                                     |                               |                                                          |                                 |
| Commissioned study <input type="checkbox"/>                                                                                                                                                                                                                                                                                                                                                                                                                                                                                                                                                                                                                                                                                                                                                                                                                                                                                                                                                                                                                                                                                                                                                                                                            |                                                                                                                                          |                                                                                                       |                                                             |                                                                     |                               |                                                          |                                 |
| Other <input type="checkbox"/> ( <i>please specify</i> )                                                                                                                                                                                                                                                                                                                                                                                                                                                                                                                                                                                                                                                                                                                                                                                                                                                                                                                                                                                                                                                                                                                                                                                               |                                                                                                                                          |                                                                                                       |                                                             |                                                                     |                               |                                                          |                                 |
| 9. Has this protocol been peer reviewed by another Committee?<br><br>Yes* <input checked="" type="checkbox"/> No <input type="checkbox"/><br><br>Reviewing Committee: The protocol was reviewed by GSK Worldwide Epidemiology Protocol Review Forum (GSK WWEpi PRF).<br>Committee review process: GSK WWEpi PRF review and approval is required for all studies conducted under the sponsorship of GSK Worldwide Epidemiology and is a binding procedure within GSK under SOP_72625(3.0). The review committee is chaired by the Vice-President (VP) of WWEpi (or their delegate) and the committee is composed of GSK staff from the following roles: 2 Epidemiologists; 1 Observational Data Analyst; 1 Medically Qualified Member; 1 Health Outcomes Advisor (optional); 1 Statistician and 1 Secretary. All members (excluding secretary) are expected to review the protocol and provide written comments to the protocol author within pre-specified timelines. These are addressed by authors and discussed at a PRF meeting. The PRF makes recommendations to the protocol authors and assigns a decision outcome.<br>Committee decision: Following review and discussion on 23 <sup>rd</sup> January 2015, this study (PRJ2282) was approved. |                                                                                                                                          |                                                                                                       |                                                             |                                                                     |                               |                                                          |                                 |
| 10. Type of Study ( <i>please tick all the relevant boxes which apply</i> )                                                                                                                                                                                                                                                                                                                                                                                                                                                                                                                                                                                                                                                                                                                                                                                                                                                                                                                                                                                                                                                                                                                                                                            |                                                                                                                                          |                                                                                                       |                                                             |                                                                     |                               |                                                          |                                 |

|                                   |                          |                  |                          |                      |                                     |
|-----------------------------------|--------------------------|------------------|--------------------------|----------------------|-------------------------------------|
| Adverse Drug Reaction/Drug Safety | <input type="checkbox"/> | Drug Use         | <input type="checkbox"/> | Disease Epidemiology | <input checked="" type="checkbox"/> |
| Drug Effectiveness                | <input type="checkbox"/> | Pharmacoeconomic | <input type="checkbox"/> | Other                | <input checked="" type="checkbox"/> |

  

|                                                |                                     |                                       |                                     |
|------------------------------------------------|-------------------------------------|---------------------------------------|-------------------------------------|
| 11. This study is intended for:                |                                     |                                       |                                     |
| Publication in peer reviewed journals          | <input checked="" type="checkbox"/> | Presentation at scientific conference | <input checked="" type="checkbox"/> |
| Presentation at company/institutional meetings | <input checked="" type="checkbox"/> | Other                                 |                                     |

|                                                                                                                                                                                                                                                                                                                                                                                                                                                                                                                                                                                                                                                                                                                                                                                                                                                                                                                                                                                                                                                                                                                                                                                                                                        |
|----------------------------------------------------------------------------------------------------------------------------------------------------------------------------------------------------------------------------------------------------------------------------------------------------------------------------------------------------------------------------------------------------------------------------------------------------------------------------------------------------------------------------------------------------------------------------------------------------------------------------------------------------------------------------------------------------------------------------------------------------------------------------------------------------------------------------------------------------------------------------------------------------------------------------------------------------------------------------------------------------------------------------------------------------------------------------------------------------------------------------------------------------------------------------------------------------------------------------------------|
| <p>12. Does this protocol also seek access to data held under the CPRD Data Linkage Scheme?</p> <p>Yes      <input checked="" type="checkbox"/>      No      <input type="checkbox"/></p>                                                                                                                                                                                                                                                                                                                                                                                                                                                                                                                                                                                                                                                                                                                                                                                                                                                                                                                                                                                                                                              |
| <p>13. If you are seeking access to data held under the CPRD Data Linkage Scheme*, please select the source(s) of linked data being requested.</p> <p> <input checked="" type="checkbox"/> Hospital Episode Statistics      <input type="checkbox"/> Cancer Registry Data**<br/> <input type="checkbox"/> MINAP      <input checked="" type="checkbox"/> ONS Mortality Data<br/> <input checked="" type="checkbox"/> Index of Multiple Deprivation/ Townsend Score<br/> <input type="checkbox"/> Mother Baby Link      <input type="checkbox"/> Other: (please specify) </p> <p><i>* As part of the ISAC review of linkages, the protocol may be shared - in confidence - with a representative of the requested linked data set(s) and summary details may be shared - in confidence - with the Confidentiality Advisory Group of the Health Research Authority.</i></p> <p><i>**Please note that applicants seeking access to cancer registry data must provide consent for publication of their study title and study institution on the UK Cancer Registry website. Please contact the CPRD Research Team on +44 (20) 3080 6383 or email <a href="mailto:kc@cprd.com">kc@cprd.com</a> to discuss this requirement further.</i></p> |
| <p>14. If you are seeking access to data held under the CPRD Data Linkage Scheme, have you already discussed your request with a member of the Research team?</p> <p>Yes      <input checked="" type="checkbox"/>      No*      <input type="checkbox"/></p> <p><i>*Please contact the CPRD Research Team on +44 (20) 3080 6383 or email <a href="mailto:kc@cprd.com">kc@cprd.com</a> to discuss your requirements before submitting your application.</i></p> <p>Please list below the name of the person/s at the CPRD with whom you have discussed your request.<br/> Rachael Williams (CPRD) is a co-investigator. Tim Williams (Head of Research, CPRD) is a member of the Scientific Steering Committee.</p>                                                                                                                                                                                                                                                                                                                                                                                                                                                                                                                     |
| <p>15. If you are seeking access to data held under the CPRD Data Linkage Scheme, please provide the following information:</p> <p>The number of linked datasets requested: 3</p> <p>A synopsis of the purpose(s) for which the linkages are required:</p> <p>Hospital Episode Statistics: two of our primary endpoints are COPD exacerbation and severe pneumonia. We therefore require information on hospital admissions for these two conditions.</p> <p>Index of Multiple Deprivation: We are comparing the demographics of Salford with the rest of the UK, and have identified deprivation as an important demographic to consider. This is also a potential confounding factor in our models.</p> <p>ONS Mortality Data: While mortality data is not an endpoint of primary interest it will be important to appropriately account for mortality as a censoring event/competing risk.</p> <p>Is linkage to a local dataset with &lt;1 million patients being requested?</p> <p>Yes*      <input type="checkbox"/>      No      <input checked="" type="checkbox"/></p> <p><i>* If yes, please provide further details:</i></p>                                                                                                 |
| <p>16. If you have requested linked data sets, please indicate whether the Principal Investigator or any of the collaborators listed in response to question 5 above, have access to any of the linked datasets in a patient identifiable form, or associated with a patient index.</p>                                                                                                                                                                                                                                                                                                                                                                                                                                                                                                                                                                                                                                                                                                                                                                                                                                                                                                                                                |

|                                                                                                                                                                                                                                             |                                     |                                   |                                     |                             |
|---------------------------------------------------------------------------------------------------------------------------------------------------------------------------------------------------------------------------------------------|-------------------------------------|-----------------------------------|-------------------------------------|-----------------------------|
| Yes*                                                                                                                                                                                                                                        | <input type="checkbox"/>            | No                                | <input checked="" type="checkbox"/> |                             |
| * If yes, please provide further details:                                                                                                                                                                                                   |                                     |                                   |                                     |                             |
|                                                                                                                                                                                                                                             |                                     |                                   |                                     |                             |
| 17. Does this protocol involve requesting any additional information from GPs?                                                                                                                                                              |                                     |                                   |                                     |                             |
| Yes*                                                                                                                                                                                                                                        | <input type="checkbox"/>            | No                                | <input checked="" type="checkbox"/> |                             |
| * Please indicate what will be required:                                                                                                                                                                                                    |                                     |                                   |                                     |                             |
| Completion of questionnaires by the GP <sup>ψ</sup>                                                                                                                                                                                         |                                     | Yes                               | <input type="checkbox"/>            | No <input type="checkbox"/> |
| Provision of anonymised records (e.g. hospital discharge summaries)                                                                                                                                                                         |                                     | Yes                               | <input type="checkbox"/>            | No <input type="checkbox"/> |
| Other (please describe)                                                                                                                                                                                                                     |                                     |                                   |                                     |                             |
| ψ Any questionnaire for completion by GPs or other health care professional must be approved by ISAC before circulation for completion.                                                                                                     |                                     |                                   |                                     |                             |
| 18. Does this protocol describe a purely observational study using CPRD data (this may include the review of anonymised free text)?                                                                                                         |                                     |                                   |                                     |                             |
| Yes*                                                                                                                                                                                                                                        | <input checked="" type="checkbox"/> | No**                              | <input type="checkbox"/>            |                             |
| * Yes: If you will be using data obtained from the CPRD Group, this study does not require separate ethics approval from an NHS Research Ethics Committee.                                                                                  |                                     |                                   |                                     |                             |
| ** No: You may need to seek separate ethics approval from an NHS Research Ethics Committee for this study. The ISAC will provide advice on whether this may be needed.                                                                      |                                     |                                   |                                     |                             |
| 19. Does this study involve linking to patient identifiable data from other sources?                                                                                                                                                        |                                     |                                   |                                     |                             |
| Yes                                                                                                                                                                                                                                         | <input type="checkbox"/>            | No                                | <input checked="" type="checkbox"/> |                             |
| 20. Does this study require contact with patients in order for them to complete a questionnaire?                                                                                                                                            |                                     |                                   |                                     |                             |
| Yes                                                                                                                                                                                                                                         | <input type="checkbox"/>            | No                                | <input checked="" type="checkbox"/> |                             |
| N.B. Any questionnaire for completion by patients must be approved by ISAC before circulation for completion.                                                                                                                               |                                     |                                   |                                     |                             |
| 21. Does this study require contact with patients in order to collect a sample?                                                                                                                                                             |                                     |                                   |                                     |                             |
| Yes*                                                                                                                                                                                                                                        | <input type="checkbox"/>            | No                                | <input checked="" type="checkbox"/> |                             |
| * Please state what will be collected                                                                                                                                                                                                       |                                     |                                   |                                     |                             |
|                                                                                                                                                                                                                                             |                                     |                                   |                                     |                             |
| 22. Experience/expertise available                                                                                                                                                                                                          |                                     |                                   |                                     |                             |
| Please complete the following questions to indicate the experience/expertise available within the team of researchers actively involved in the proposed research, including analysis of data and interpretation of results                  |                                     |                                   |                                     |                             |
| Previous GPRD/CPRD Studies                                                                                                                                                                                                                  |                                     | Publications using GPRD/CPRD data |                                     |                             |
| None                                                                                                                                                                                                                                        | <input type="checkbox"/>            |                                   | <input type="checkbox"/>            |                             |
| 1-3                                                                                                                                                                                                                                         | <input type="checkbox"/>            |                                   | <input type="checkbox"/>            |                             |
| > 3                                                                                                                                                                                                                                         | <input checked="" type="checkbox"/> |                                   | <input checked="" type="checkbox"/> |                             |
| Is statistical expertise available within the research team?                                                                                                                                                                                |                                     |                                   | Yes                                 | No                          |
|                                                                                                                                                                                                                                             |                                     |                                   | <input checked="" type="checkbox"/> | <input type="checkbox"/>    |
| If yes, please outline level of experience                                                                                                                                                                                                  |                                     |                                   |                                     |                             |
| All applicants have advanced statistical expertise – e.g. all have PhDs <a href="#">or equivalent</a> with statistical component.                                                                                                           |                                     |                                   |                                     |                             |
| Is experience of handling large data sets (>1 million records) available within the research team?                                                                                                                                          |                                     |                                   | <input checked="" type="checkbox"/> | <input type="checkbox"/>    |
| If yes, please outline level of experience                                                                                                                                                                                                  |                                     |                                   |                                     |                             |
| The study will be based within the Centre for Health Informatics at the University of Manchester, which has substantial infrastructure and experience for handling large data sets. Both University of Manchester and GSK already have CPRD |                                     |                                   |                                     |                             |

licences and applicants have been using CPRD actively.

Is UK primary care experience available within the research team?

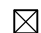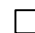

*If yes, please outline level of experience*

All applicants are actively researching in primary care.

### 23. References relating to your study

Please list up to 3 references (most relevant) relating to your proposed study.

1. New JP, Bakerly ND, Leather D, Woodcock A. Obtaining real-world evidence: the Salford Lung Study. Thorax. 2014 Apr 26 e pub ahead of print.
2. van Staa T-P, Goldacre B, Gulliford M, Cassell J, Pirmohamed M, Taweel A, Delaney B, Smeeth L. Pragmatic randomised trials using routine electronic health records: putting them to the test. BMJ 2012, 344: e55 doi: 10.1136.
3. French J.R.P. Experiments in field settings. In: Festinger L., Katz D., editors. Research methods in the behavioral sciences. Holt, Rinehart & Winston; New York, NY: 1953

## PROTOCOL CONTENT CHECKLIST

In order to help ensure that protocols submitted for review contain adequate information for protocol evaluation, ISAC have produced instructions on the content of protocols for research using CPRD data. These instructions are available on the CPRD website ([www.cprd.com/ISAC](http://www.cprd.com/ISAC)). All protocols using CPRD data which are submitted for review by ISAC must contain information on the areas detailed in the instructions. IF you do not feel that a specific area required by ISAC is relevant for your protocol, you will need to justify this decision to ISAC.

Applicants must complete the checklist below to confirm that the protocol being submitted includes all the areas required by ISAC, or to provide justification where a required area is not considered to be relevant for a specific protocol. Protocols will not be circulated to ISAC for review until the checklist has been completed by the applicant.

**Please note, your protocol will be returned to you if you do not complete this checklist, or if you answer 'no' and fail to include justification for the omission of any required area.**

| Required area                                                                                          | Included in protocol?               |                                     | If no, reason for omission                                                       |
|--------------------------------------------------------------------------------------------------------|-------------------------------------|-------------------------------------|----------------------------------------------------------------------------------|
|                                                                                                        | Yes                                 | No                                  |                                                                                  |
| <i>Lay Summary (max.200 words)</i>                                                                     | <input checked="" type="checkbox"/> | <input type="checkbox"/>            |                                                                                  |
| <i>Background</i>                                                                                      | <input checked="" type="checkbox"/> | <input type="checkbox"/>            |                                                                                  |
| <i>Objective, specific aims and rationale</i>                                                          | <input checked="" type="checkbox"/> | <input type="checkbox"/>            |                                                                                  |
| <i>Study Type</i>                                                                                      |                                     |                                     |                                                                                  |
| <i>Descriptive</i>                                                                                     | <input checked="" type="checkbox"/> | <input type="checkbox"/>            |                                                                                  |
| <i>Hypothesis Generating</i>                                                                           | <input type="checkbox"/>            | <input type="checkbox"/>            |                                                                                  |
| <i>Hypothesis Testing</i>                                                                              | <input type="checkbox"/>            | <input type="checkbox"/>            |                                                                                  |
| <i>Study Design</i>                                                                                    | <input checked="" type="checkbox"/> | <input type="checkbox"/>            |                                                                                  |
| <i>Sample size/power calculation<br/>(Please provide justification of sample size in the protocol)</i> | <input checked="" type="checkbox"/> | <input type="checkbox"/>            |                                                                                  |
| <i>Study population<br/>(including estimate of expected number of relevant patients in the CPRD)</i>   | <input checked="" type="checkbox"/> | <input type="checkbox"/>            |                                                                                  |
| <i>Selection of comparison group(s) or controls</i>                                                    | <input checked="" type="checkbox"/> | <input type="checkbox"/>            |                                                                                  |
| <i>Exposures, outcomes and covariates</i>                                                              | <input checked="" type="checkbox"/> | <input type="checkbox"/>            |                                                                                  |
| <i>Exposures are clearly described</i>                                                                 | <input checked="" type="checkbox"/> | <input type="checkbox"/>            |                                                                                  |
| <i>Outcomes are clearly described</i>                                                                  | <input checked="" type="checkbox"/> | <input type="checkbox"/>            |                                                                                  |
| <i>Use of linked data<br/>(if applicable)</i>                                                          | <input checked="" type="checkbox"/> | <input type="checkbox"/>            |                                                                                  |
| <i>Data/ Statistical Analysis Plan</i>                                                                 | <input checked="" type="checkbox"/> | <input type="checkbox"/>            |                                                                                  |
| <i>There is plan for addressing confounding</i>                                                        | <input checked="" type="checkbox"/> | <input type="checkbox"/>            |                                                                                  |
| <i>There is a plan for addressing missing data</i>                                                     | <input checked="" type="checkbox"/> | <input type="checkbox"/>            |                                                                                  |
| <i>Patient/ user group involvement <sup>†</sup></i>                                                    | <input type="checkbox"/>            | <input checked="" type="checkbox"/> | This is a purely observational study, and quality of life will not be evaluated. |
| <i>Limitations of the study design, data sources and analytic methods</i>                              | <input checked="" type="checkbox"/> | <input type="checkbox"/>            |                                                                                  |
| <i>Plans for disseminating and communicating study results</i>                                         | <input checked="" type="checkbox"/> | <input type="checkbox"/>            |                                                                                  |

**<sup>†</sup> It is expected that many studies will benefit from the involvement of patient or user groups in their planning and refinement, and/or in the interpretation of the results and plans for further work. This is particularly, but not exclusively true of studies with interests in the impact on quality of life. Please indicate whether or not you intend to engage patients in any of the ways mentioned above.**

### **Voluntary registration of ISAC approved studies:**

Epidemiological studies are increasingly being included in registries of research around the world, including those primarily set up for clinical trials. To increase awareness amongst researchers of ongoing research, ISAC encourages voluntary registration of epidemiological research conducted using MHRA databases. This

*will not replace information on ISAC approved protocols that may be published in its summary minutes or annual report. It is for the applicant to determine the most appropriate registry for their study. Please inform the ISAC secretariat that you have registered a protocol and provide the location.*

**PRJ2282: CRESS: CPRD-COPD Hawthorn Effect Study in Salford:  
A UK cohort study to characterise patients enrolled in the Salford Lung Study  
and to evaluate a potential Hawthorne effect**

## **Lay Summary**

The Salford Lung Study (SLS) is an evaluation of a new drug, RELVAR, taking place in Salford, UK. RELVAR is a drug that treats chronic obstructive pulmonary disease (COPD). The study is unique in that it is taking place in routine care, so it is hoped that the results will show how effective the drug is in the 'real world'.

However, one issue with a study of this kind is that the fact that the study is taking place raises awareness of COPD in both patients and clinicians taking part. This could lead to the 'Hawthorne effect', in which patients in both the group receiving RELVAR, and the group receiving usual care, do better than the general population.

In this study we aim to compare outcomes for patients in the SLS with other COPD patients in the UK who are not in the study, to see whether the Hawthorne effect occurs and its severity. We will also assess whether the COPD patients in the SLS are similar to the rest of the UK. The conclusions will help us understand the extent to which the findings of the SLS can be generalised to the rest of the UK.

## **Background**

COPD is a chronic obstructive disease of the airways associated with a significant social and healthcare burden [1, 2, 3]. Most patients with COPD are managed in primary care, as reflected in recent UK guidelines, which are specifically targeted at primary care physicians [4]. The major goals of treatment are to relieve symptoms, improve activity/exercise tolerance, prevent and treat exacerbations, reduce mortality risk and improve health status. However, despite such guidelines, COPD remains under-diagnosed and under-treated; variations in treatments, standards of care and adherence to guidelines have been reported across different geographical regions [2, 5, 6, 7, 8].

Large computerised patient databases provide a useful source of real life observational data, and the General Practice Research Database (GPRD) has been successfully used to generate descriptive epidemiology data in COPD [9, 10, 11, 12] from a large group of UK primary care practices. GPRD has also been used previously for descriptive drug utilization studies for prescription medications in respiratory diseases [16, 17, 18]. Historically, the limitations of the GPRD were a time gap between data capture and availability for the researcher and limited links to other healthcare databases, although these are currently being addressed with the development of the Clinical Practice Research Datalink (CPRD) and in recent Phase 4 pragmatic clinical trials [12]. The use of electronic medical record (EMR) data in health research is a key objective in the Department of Health's national research strategy [13].

The SLS is an ongoing Phase IIIB pragmatic trial comparing a new once daily ICS/LABA fixed dose combination (RELVAR: fluticasone furate + vilanterol) in which patients are identified by EMR, enrolled in their GP office, randomized to

RELVAR or standard of care (SOC) maintenance therapy via their neighbourhood pharmacy, and followed for safety and effectiveness via linked primary care/secondary routine care with the primary endpoint of COPD moderate/severe exacerbations over 12 months [14]. MHRA and NICE provided joint advice for the SLS protocol and were supportive of the design to generate “real world” evidence which will demonstrate the value of the medicine against the most relevant standard of care.

Although the SLS will give evidence on the relative effectiveness of RELVAR compared with SOC, the SOC may be prone to the Hawthorne effect, which may distort the effect size.

The Hawthorne effect (also referred to as the observer effect) is a type of [reactivity](#) in which individuals improve or modify an aspect of their behaviour in response to their awareness of being observed. The original "Hawthorne effect" studies at the [Hawthorne Works](#) in Chicago, USA between 1924 and 1933 suggested that the novelty of being research subjects and the increased attention from such could lead to temporary increases in workers' productivity [15].

Additionally, Salford may not be representative of general UK population; hence the prognostic profiles, and potential effect of RELVAR in terms of the outcomes may differ in the general target COPD population compared with Salford.

Both of these issues mean that extrapolation of the results of the SLS to the wider UK population would be subject to major caveats. This proposal aims to explore, and assess how severe the caveats need to be.

## **Objectives**

### Co-primary objectives:

PO1: To characterize the patients enrolled in the SOC arm of the SLS compared with the UK population of COPD patients (using CPRD linked data), including the distribution of deprivation levels, to evaluate the extent to which the SLS participants are representative of the UK patient population targeted for RELVAR. The comparator set will be specified on two bases: firstly, overall, and secondly, the subset fulfilling the protocol inclusion/exclusion criteria.

PO2: To compare the rate of COPD exacerbation over the 12 months in the SOC arm of the SLS compared with the SOC recorded in the CPRD linked data, in order to detect a potential Hawthorne effect as a result of potentially increased attention paid by GPs and nurses to patients with COPD during the SLS study period.

PO3: To compare the rate of severe pneumonia over the 12 months in the SOC arm of the SLS compared with the SOC recorded in the CPRD linked data. Severe pneumonia is a safety signal being assessed in the SLS.

### Secondary objectives:

SO1: To make comparisons between the SLS Standard of care and the CPRD cohort on the following health care utilisation (HCU) endpoints: GP visits, hospital admissions, mortality and adherence.

SO2: To evaluate other definitions of COPD exacerbation in SOC from CPRD.

SO3: Self-controlled comparison of COPD and other HCU endpoints in Salford before and after SLS commenced.

### **Study Type**

The study will primarily be descriptive.

### **Study Design**

This will be an observational COPD cohort study that will utilize the CPRD linked data and the Salford EHR system to compare selected cohorts with SLS.

For SLS, the reference/index date is study entry. This will be matched in the CPRD cohort by the following algorithm:

1. Draw up a long-list of potentially eligible individuals in the CPRD linked data (patients who would be eligible at some point during the SLS recruitment phase).
2. For each individual:
  - a. Randomly sample an entry date from full list of SLS entry dates.
  - b. If patient is eligible at that entry date, then they will be included, otherwise, they will be excluded.

First, the COPD populations in both Salford and in the wider CPRD cohort (excluding Greater Manchester area) will be compared. Second, we will focus on comparisons between all patients enrolled in the SLS versus the larger CPRD defined COPD cohort “eligible for RELVAR prescription” (target patient population per label). Third, we will compare the COPD exacerbation response between eligible CPRD population, and the Salford population in SLS receiving SOC, in a multilevel model – i.e. evaluating Hawthorne effect.

### **Sample Size**

The target sample size for the number of COPD patients enrolled in the SLS is 2,800. A preliminary feasibility count using the February 2015 version of the CPRD GOLD database identified 265,076 patients with a Read code for COPD in their clinical or referral files (see Annex 1 for codelist), with at least one day of up-to-standard registration aged 40+, and eligible for linkage to Hospital Episode Statistics (HES), ONS mortality data and deprivation data. This is a large number of cases and as the study is primarily descriptive, a power calculation is not required.

## Data Linkage

Linkages to inpatient HES data, Index of Multiple Deprivation (IMD) data and ONS mortality data will be used in this study. HES will be used to identify two of the primary endpoints - hospital admissions for COPD exacerbation and severe pneumonia. IMD data will be used adjust for confounding due to deprivation. ONS mortality data will be used to censor at death. The entire study will be undertaken among linked practices only.

Fully linked data will only be available up to a certain date when analyses are undertaken (currently March 2014), and as such, primary analyses will be restricted to include SLS enrolled patients up to that date. Subsequent analyses will be conducted once linkage is available for the entire recruitment period.

## Study Population

Two cohorts will be produced. First, a CPRD cohort, using linked primary care, medication, Hospital Episode Statistics, and socio-economic data, according to the following inclusion criteria:

1. Diagnosis of COPD before index date
2. Aged  $\geq 40$  at index date.
3. Alive, and registered with a GP, at index date.
4. Not registered with a GP in the Greater Manchester area.

Second, a Salford cohort will be constructed using the Salford Integrated Record (SIR). The SIR is a comprehensive primary and secondary care database detailing healthcare contacts, diagnostic tests and prescriptions of all patients registered with a GP in Salford, UK. Patients will be included according to the following criteria:

1. Diagnosis of COPD before index date.
2. Aged  $\geq 40$  at index date.
3. Alive, and registered with a GP, at index date.

Restricted cohorts will then be constructed in both the Salford and CPRD populations, based on the inclusion/exclusion criteria and study period for the SLS:

1. Patients with documented GP diagnosis of COPD, and currently receiving maintenance therapy
2. Male or female subjects aged  $\geq 40$  years of age at index date
3. Patients who have a history of treatment with systemic/oral corticosteroids, antibiotics (in association with GP contact) and/or hospitalisation for at least one COPD exacerbation in the 3 years prior to index date.
4. Current COPD Therapy : all patients currently receiving either:
  - inhaled corticosteroid (ICS) alone or in combination with a long acting bronchodilator (this could be a fixed dose combination or an ICS/LABA provided in two separate inhalers, or ICS and LAMA),
  - or long-acting bronchodilator therapy alone (e.g. tiotropium or salmeterol, or the use of two bronchodilators i.e. LABA/LAMA),
  - or “triple therapy” i.e. ICS/LABA plus a Long Acting Muscarinic Antagonist (LAMA)

Finally, the third data source, the SLS, will be used as-is. The SLS is described in [14]. In brief, it is a pragmatic trial, carried out in Salford, UK, to evaluate the relative effectiveness of RELVAR compared with SOC.

Subjects meeting any of the following criteria will be excluded from the restricted cohorts:

1. Patients with any life threatening condition or uncontrolled/clinically significant disease
2. Patients with unstable COPD: Patients with an exacerbation (defined by treatment with oral corticosteroids and/or antibiotic or hospital discharge listing COPD) with an onset within 2 weeks of index date.
3. Chronic user of oral corticosteroids: Subjects who are considered to be a chronic user of oral corticosteroids for respiratory or other indications
4. In the Salford population only, those patients who are entered in the SLS and randomised to the RELVAR arm.

## **Exposures**

This is a binary comparison of COPD patients enrolled in the SLS and COPD patients in the CPRD cohort. Hence the primary exposure of interest is whether a patient is enrolled in SLS (yes/no). A third grouping, COPD patients in Salford (who are not in SLS) will also be examined.

## **Outcomes**

### *Primary outcomes/endpoint:*

- Rate of COPD exacerbation: Moderate/severe COPD exacerbations will be identified using an algorithm combining GP visits, prescriptions for oral corticosteroids and/or antibiotics, or hospital admission, as defined using information from the ongoing study being conducted by Jenny Quint et al. (collaborative project between London School of Hygiene and Tropical Medicine and GSK). The rate of exacerbation during the 12 month follow-up will be calculated and compared with the SLS rate in the standard of care arm; if technically possible, exacerbation rates for the 12 months prior to index date (matched enrolment date) will also be compared.
- Pneumonia: To be defined as per the codelist used in SLS – see Annex 2 and 3

### *Secondary outcomes/endpoints:*

- Healthcare utilisation: All GP visits/encounters and all hospital admissions during the 12 month follow-up.
- Adherence to index prescription: Defined as percent days covered (PDC) and medication possession ratio (MPR) will also be calculated for the matched cohort, as well as discontinuation, switching medicine or adding on other medicines, to be compared with the SLS SOC arm.
- Deaths: All cause, pneumonia death, COPD-attributed death during the 12 month follow-up. For the CPRD, deaths will be determined using Office of National Statistics (ONS) linked mortality data.
- Other definitions of COPD exacerbation: Other definitions will be described as per the outputs of Jenni Quint's study.

## Covariates

Covariates will include :

- demographic variables (sex, age, IMD)
- current exposure to LAMA, LABA and ICD
- comorbidities (heart failure, myocardial infarction, stroke, depression, anxiety, asthma, pneumonia, gastro-oesophageal reflux and peptic ulcer disease, Charlson score (COPD will be removed from score), disability)
- markers of COPD severity (previous COPD exacerbation, FEV1 % predicted, FEV1/FVC ratio, GOLD stage, MRC Dyspnoea score )
- co-medications and vaccinations
- lifestyle behaviours (smoking status, BMI)

## Analysis

All analyses will be conducted using SAS.

For PO1, distributions of the confounders and effect modifiers will be tabulated, summarised as proportions in each category for binary and categorical variables, and means/medians and standard deviations for continuous variables. Graphical visualisations will also be produced to aid interpretation (for example, boxplots to characterise age distributions in each population, stacked bar charts to visualise deprivation by population). This will be done for a series of the derived populations to separate out true differences in demographics in Salford and differences that arise as a consequence of data quality issues etc.

There are a range of subsets and derivations of the data sources that will be considered for this study, listed here for clarity.

|                     |                                                                                                      |
|---------------------|------------------------------------------------------------------------------------------------------|
| <b>CPRD:</b>        | all CPRD COPD patients                                                                               |
| <b>CPRD-GM:</b>     | CPRD COPD patients registered in practices in Greater Manchester                                     |
| <b>CPRD-xGM:</b>    | CPRD COPD patients registered in non-Greater Manchester practices                                    |
| <b>CPRD-GM-IC:</b>  | CPRD COPD patients registered in practices in Greater Manchester meeting the SLS inclusion criteria  |
| <b>CPRD-xGM-IC:</b> | CPRD COPD patients registered in non-Greater Manchester practices meeting the SLS inclusion criteria |
| <b>SLS-E:</b>       | SLS – all eligible. Not all of these are enrolled (some decline)                                     |
| <b>SLS:</b>         | SLS – all enrolled                                                                                   |
| <b>SLS-SOC:</b>     | SLS – SOC arm only                                                                                   |
| <b>SIR:</b>         | SIR – all COPD patients                                                                              |
| <b>SIR-IC:</b>      | SIR - COPD patients meeting SLS inclusion criteria only                                              |

The following comparisons will be of interest:

- CPRD-GM v CPRD-xGM: to give an indication of true demographic difference from the same data source.
- CPRD-GM-IC v CPRD-xGM-IC: as above, but restricted to patients meeting the inclusion criteria.
- SIR v CPRD-GM: to give an indication of differences arising as a consequence of selection bias of CPRD practices, and through data quality issues etc.

- SIR-IC v CPRD-GM-IC: as above, but restricted to patients meeting the inclusion criteria.
- SIR-IC v SLS-E: to give an indication of recruitment bias and physician researcher bias (at the approach stage).
- SIR-IC v SLS: to give an indication of recruitment bias (at recruitment stage).
- SLS v CPRD-xGM-IC: to indicate the difference between trial recruited, and those meeting the inclusion criteria outside of Salford. This is the key comparison for addressing PO1.

We will then move on to explicit modelling of regional variation of the characteristics within the CPRD cohort to ascertain whether the characteristics observed within Salford are unusual by comparison with CPRD-xGM-IC. We will take local authority regional level (anonymised) as the comparable unit to the study region for SLS. SLS will be considered unusual on a given demographic if an appropriately chosen summary statistic for that demographic (mean for continuous variables) falls outside the 2.5-97.5 percentile range.

Missing data in confounders and effect modifiers will be imputed using multiple imputation for the primary analysis, with complete case analysis included as sensitivity analysis.

For PO2, we will commence with exploratory analyses, similar to described above, to explore the distributions of the primary and secondary endpoints. The Hawthorne effect will be evaluated in two different ways.

Firstly, for descriptive purposes, we will measure the prevalence of the endpoints in a series of subgroups. For example, we will compare the COPD exacerbations in CPRD-xGM-IC with SLS, stratified by SES, gender, etc.

Secondly, we will take a multilevel modelling approach. For this we will combine the SLS and CPRD into one dataset (retaining an indicator of SLS membership). The hierarchies of the model will be patient -> GP practice -> local authority region (with SLS members being treated as a single distinct region) -> strategic health authority region. Strategic health authorities (population threshold of 1 million) are non-anonymised (named) regions. Local authority regions are below the population threshold so an anonymised LA marker will be available.

We will include all confounders and effect modifiers as covariates, with outcomes corresponding to the primary and secondary study outcomes (a separate model for each). Important fixed effects at the local authority level (for example, existence of community teams) will be incorporated into the model if these can be ascertained. As above, confounders and effect modifiers will be imputed using multiple imputation for the primary analysis, with complete case analysis included as sensitivity analysis.

A final model will be selected via backward selection using AIC (Akaike Information Criterion). We will then examine the random effect of the SLS region in the context of the random effects for the other regions. Similar to the above, if the random effect of the SLS region falls outside the 2.5-97.5 percentile range, we will conclude that SOC SLS behaves unusually compared with the rest of the UK, and hence evidence of a Hawthorne effect.

PO3, SO1 and SO2 (which pertain to comparing other endpoints and sensitivity analyses of endpoint definition) will be carried out using the same approach as for PO2.

SO3 makes explicit the possible change in outcomes at commencement of SLS. We will compare outcome rates within Salford before and after the commencement of SLS, in a self-controlling case design. We will do the same thing within the CPRD cohort to control for UK-wide secular trends. This acts as sensitivity analysis to support PO2 (using controls distinct in time rather than in geography).

The QC of analysis will be performed by GSK, in accordance with GSK Standard Operating Procedures (SOPs) and Guidance Documents, specifically the SOP\_52213 (4.0) : Conducting Quality Control Review of Worldwide Epidemiology Study Results. Wherever feasible, all statistical programming will be independently reviewed by a second analyst, with oversight by a senior statistician.

## **Limitations**

The Hawthorne effect can only be evaluated for the SOC comparison. This does not give definite evidence about whether the prognostic or predictive effect of RELVAR would differ in the general population. This information could only truly be obtained following use of RELVAR in the general population.

There is no direct metric by which ‘representativeness’ of the Salford cohort can be measured. Early explorations of this will be made in a companion project outside the scope of this protocol.

While GP data are the same, some data (hospital validated COPD diagnoses, pharmacy data) for participants in SLS are collected using a different mechanism to CPRD GOLD. Hence any differences (either in representativeness or treatment response) observed between the SLS and non-SLS cohorts could be attributed to differences in data quality and the data collection mechanism. This will be mitigated by an additional comparison of SLS data with CPRD GOLD data from within Greater Manchester.

## **Plans for Dissemination**

This work is targeted 1) internally at GSK, 2) regulators and 3) the wider scientific community; in order to understand the SLS in wider context. Results will be disseminated externally primarily by manuscripts, including a submission to Thorax in Q2 2016 based on interim results, and followed by a subsequent manuscript containing the final analyses of the data (planned for Q4 2016). In addition, we will present the results of the study at international respiratory conferences as appropriate. The study protocol and results will be posted to GSK Clinical Study Register as per GSK SOPs.

## References

4. Vestbo J, Hurd SS, Agusti AG, Jones PW, Vogelmeier C, Anzueto A, Barnes PJ, Fabbri LM, Martinez FJ, Nishimura M, Stockley RA, Sin DD, Rodriguez-Roisin R. Global Strategy for the Diagnosis, Management and Prevention of Chronic Obstructive Pulmonary Disease, GOLD Executive Summary. *Am J Respir Crit Care Med* 2013, 187: 347-365.
5. Mathers CD, Loncar D. Projections of Global Mortality and Burden of Disease from 2002 to 2030. *PLoS Med* 2006, 3(11): e442.
6. Lopez AD, Shibuya K, Rao C, Mathers CD, Hansell AL, Held LS, Schmid V, Buist S. Chronic obstructive pulmonary disease: current burden and future projections. *Eur Respir J* 2006, 27: 397-412.
7. Bellamy D, Bouchard J, Henrichsen S, Johansson G, Langhammer A, Reid J, van Weel C, Buist S. International Primary Care Respiratory Group (IPCRG) Guidelines: Management of Chronic Obstructive Pulmonary Disease (COPD). *Prim Care Respir* 2006, 15:48-57.
8. Sobradillo-Peña V, Miravittles M, Gabriel R, Jiménez-Ruiz CA, Villasante C, Masa JF, Viejo JL, Fernández-Fau L. Geographic variations in prevalence and underdiagnosis of COPD: results of the IBERPOC multicentre epidemiological study. *Chest* 2000, 118: 981-9.
9. Soriano JB, Miravittles M, Borderías L, Duran-Tauleria E, García Río F, Martínez J, Montemayor T, Muñoz L, Piñeiro L, Sánchez G, Serra J, Soler-Cataluña JJ, Torres A, Viejo JL, Sobradillo-Peña V, Ancochea J. Geographical Variations in the Prevalence of COPD in Spain: Relationship to Smoking, Death Rates and other Determining Factors. *Arch Bronconeumol*. 2010, 46: 522-530.
10. Aisanov Z, Bai C, Bauerle O, Colodenco FD, Feldman C, Hashimoto S, Jardim J, Lai CKW, Laniado-Laborin R, Nadeau G, Sayiner A, Shim JJ, Tsai YH, Walters RD, Waterer G. Primary care physician perceptions on the diagnosis and management of chronic obstructive pulmonary disease in diverse regions of the world. *Int J Chron Obstruct Pulmon Dis* 2012, 7: 271-282.
11. Corrado A, Rossi A. How far is real life from COPD therapy guidelines? An Italian observational study. *Respir Med*. 2012, 106: 989-97.
12. Hansell A, Hollowell J, Nichols T, McNiece R, Strachan D. Use of the General Practice Research Database (GPRD) for respiratory epidemiology: a comparison with the 4th Morbidity Survey in General Practice (MSGP4). *Thorax* 1999, 54: 413-419.
13. Soriano JB, Maier WC, Egger P, Visick G, Thakrar B, Sykes J, Pride NB. Recent trends of physician-diagnosed COPD in women and men in the UK. *Thorax* 2000, 55: 789-794.
14. Hansell AL, Lam KA, Richardson S, Visick G, Soriano JB. Medical event profiling of COPD patients. *Pharmacoepidemiol Drug Saf* 2004, 13: 547-555.
15. van Staa T-P, Goldacre B, Gulliford M, Cassell J, Pirmohamed M, Taweel A, Delaney B, Smeeth L. Pragmatic randomised trials using routine electronic health records: putting them to the test. *BMJ* 2012, 344: e55 doi: 10.1136.
16. Department of Health (Research and Development Directorate) policy paper: Best research for best health: a new national health research strategy. 25 January 2006. Last accessed 06 June 2013 [www.dh.gov.uk/en/Publicationsandstatistics/Publications/PublicationsPolicyAndGuidance/DH\\_4127127](http://www.dh.gov.uk/en/Publicationsandstatistics/Publications/PublicationsPolicyAndGuidance/DH_4127127).

17. New JP, Bakerly ND, Leather D, Woodcock A. Obtaining real-world evidence: the Salford Lung Study. *Thorax*. 2014 Apr 26 e pub ahead of print.
18. French J.R.P. Experiments in field settings. In: Festinger L., Katz D., editors. *Research methods in the behavioral sciences*. Holt, Rinehart & Winston; New York, NY: 1953
19. DiSantostefano RL, Sampson T, Le HV, Hinds D, Davis KJ, Bakerly ND. Risk of Pneumonia with Inhaled Corticosteroid versus Long-Acting Bronchodilator Regimens in Chronic Obstructive Pulmonary Disease: A New-User Cohort Study. *PLoS One*. 2014; 9(5):e97149.
20. Ashworth M, Latinovic R, Charlton J, Cox K, Rowlands G, Gulliford M. Why has antibiotic prescribing for respiratory illness declined in primary care? A longitudinal study using the General Practice Research Database. *J Public Health (Oxf)*. 2004; 26(3):268-274.
21. van Staa TP, Cooper C, Leufkens HG, Lammers JW, Suissa S. The use of inhaled corticosteroids in the United Kingdom and the Netherlands. *Respir Med*. 2003; 97(5):578-585.

## **Annex 1 : Read codes to be used to identify COPD**

| <b>Read Code</b> | <b>Read Term</b>                                                     |
|------------------|----------------------------------------------------------------------|
| 66YB.00          | Chronic obstructive pulmonary disease monitoring                     |
| 66YB000          | Chronic obstructive pulmonary disease 3 monthly review               |
| 66YB100          | Chronic obstructive pulmonary disease 6 monthly review               |
| 66Yd.00          | COPD accident and emergency attendance since last visit              |
| 66YD.00          | Chronic obstructive pulmonary disease monitoring due                 |
| 66Ye.00          | Emergency COPD admission since last appointment                      |
| 66Yf.00          | Number of COPD exacerbations in past year                            |
| 66Yg.00          | Chronic obstructive pulmonary disease disturbs sleep                 |
| 66Yh.00          | Chronic obstructive pulmonary disease does not disturb sleep         |
| 66YI.00          | COPD self-management plan given                                      |
| 66Yi.00          | Multiple COPD emergency hospital admissions                          |
| 66YL.00          | Chronic obstructive pulmonary disease follow-up                      |
| 66YL.11          | COPD follow-up                                                       |
| 66YM.00          | Chronic obstructive pulmonary disease annual review                  |
| 66YS.00          | Chronic obstructive pulmonary disease monitoring by nurse            |
| 66YT.00          | Chronic obstructive pulmonary disease monitoring by doctor           |
| 8BMW.00          | Issue of chronic obstructive pulmonary disease rescue pack           |
| 8BP8.00          | Antibiotic therapy for acute pulmonary exacerbation                  |
| 8CE6.00          | Chronic obstructive pulmonary disease leaflet given                  |
| 8CR1.00          | Chronic obstructive pulmonary disease clinical management plan       |
| 8H2R.00          | Admit COPD emergency                                                 |
| 9h52.00          | Excluded from COPD quality indicators: Informed dissent              |
| 9kf..00          | COPD - enhanced services administration                              |
| 9kf0.00          | COPD patient unsuitable for pulmonary rehab - enhanced service admin |
| 9kf0.11          | COPD patient unsuitable for pulmonary rehabilitation                 |
| 9kf1.00          | Refer COPD structured smoking assessment - enhanced service admin    |
| 9kf1.11          | Referred for COPD structured smoking assessment                      |
| 9kf2.00          | COPD structured smoking assessment declined - enhanced service admin |
| 9kf2.11          | COPD structured smoking assessment declined                          |
| 9Oi..00          | Chronic obstructive pulmonary disease monitoring admin               |
| 9Oi0.00          | Chronic obstructive pulmonary disease monitoring 1st letter          |
| 9Oi1.00          | Chronic obstructive pulmonary disease monitoring 2nd letter          |
| 9Oi2.00          | Chronic obstructive pulmonary disease monitoring 3rd letter          |
| 9Oi3.00          | Chronic obstructive pulmonary disease monitoring verb invite         |
| 9Oi4.00          | Chronic obstructive pulmonary disease monitor phone invite           |
| H3...00          | Chronic obstructive pulmonary disease                                |
| H3...11          | Chronic obstructive airways disease                                  |
| H30..00          | Bronchitis unspecified                                               |
| H30..11          | Chest infection - unspecified bronchitis                             |
| H30..12          | Recurrent wheezy bronchitis                                          |
| H300.00          | Tracheobronchitis NOS                                                |
| H301.00          | Laryngotracheobronchitis                                             |
| H302.00          | Wheezy bronchitis                                                    |
| H30z.00          | Bronchitis NOS                                                       |
| H31..00          | Chronic bronchitis                                                   |
| H310.00          | Simple chronic bronchitis                                            |
| H310000          | Chronic catarrhal bronchitis                                         |

|         |                                                              |
|---------|--------------------------------------------------------------|
| H310100 | Smokers' cough                                               |
| H310z00 | Simple chronic bronchitis NOS                                |
| H311.00 | Mucopurulent chronic bronchitis                              |
| H311000 | Purulent chronic bronchitis                                  |
| H311100 | Fetid chronic bronchitis                                     |
| H311z00 | Mucopurulent chronic bronchitis NOS                          |
| H312.00 | Obstructive chronic bronchitis                               |
| H312000 | Chronic asthmatic bronchitis                                 |
| H312011 | Chronic wheezy bronchitis                                    |
| H312100 | Emphysematous bronchitis                                     |
| H312200 | Acute exacerbation of chronic obstructive airways disease    |
| H312300 | Bronchiolitis obliterans                                     |
| H312z00 | Obstructive chronic bronchitis NOS                           |
| H313.00 | Mixed simple and mucopurulent chronic bronchitis             |
| H31y.00 | Other chronic bronchitis                                     |
| H31y000 | Chronic tracheitis                                           |
| H31y100 | Chronic tracheobronchitis                                    |
| H31yz00 | Other chronic bronchitis NOS                                 |
| H31z.00 | Chronic bronchitis NOS                                       |
| H32..00 | Emphysema                                                    |
| H320.00 | Chronic bullous emphysema                                    |
| H320000 | Segmental bullous emphysema                                  |
| H320100 | Zonal bullous emphysema                                      |
| H320200 | Giant bullous emphysema                                      |
| H320300 | Bullous emphysema with collapse                              |
| H320311 | Tension pneumatocele                                         |
| H320z00 | Chronic bullous emphysema NOS                                |
| H321.00 | Panlobular emphysema                                         |
| H322.00 | Centrilobular emphysema                                      |
| H32y.00 | Other emphysema                                              |
| H32y000 | Acute vesicular emphysema                                    |
| H32y100 | Atrophic (senile) emphysema                                  |
| H32y111 | Acute interstitial emphysema                                 |
| H32y200 | MacLeod's unilateral emphysema                               |
| H32yz00 | Other emphysema NOS                                          |
| H32z.00 | Emphysema NOS                                                |
| H36..00 | Mild chronic obstructive pulmonary disease                   |
| H37..00 | Moderate chronic obstructive pulmonary disease               |
| H38..00 | Severe chronic obstructive pulmonary disease                 |
| H39..00 | Very severe chronic obstructive pulmonary disease            |
| H3A..00 | End stage chronic obstructive airways disease                |
| H3y..11 | Other specified chronic obstructive pulmonary disease        |
| H3y0.00 | Chronic obstruct pulmonary dis with acute lower resp infectn |
| H3y1.00 | Chron obstruct pulmonary dis wth acute exacerbation, unspec  |
| H3z..00 | Chronic obstructive airways disease NOS                      |
| H3z..11 | Chronic obstructive pulmonary disease NOS                    |

## Annex 2 : ICD-10 codes to be used to identify pneumonia

| ICD-10 code | ICD-10 description                                               |
|-------------|------------------------------------------------------------------|
| A06.5       | Amoebic lung abscess                                             |
| A15*        | Respiratory TB bacteriologically and histologically confirmed    |
| A16*        | Respiratory TB not confirmed bacteriologically or histologically |
| A19*        | Miliary tuberculosis                                             |
| A20.2       | Pneumonic plague                                                 |
| A21.2       | Pulmonary tularaemia                                             |
| A22.1       | Pulmonary anthrax                                                |
| A31.0       | Pulmonary mycobacterial infection                                |
| A42.0       | Pulmonary actinomycosis                                          |
| A43.0       | Pulmonary nocardiosis                                            |
| A48.1       | Legionnaires' disease                                            |
| B01.2       | Varicella pneumonia                                              |
| B05.2       | Measles complicated by pneumonia                                 |
| B20.6       | HIV disease resulting in Pneumocystis carinii pneumonia          |
| B25.0       | Cytomegaloviral pneumonitis                                      |
| B37.1       | Pulmonary candidiasis                                            |
| B38*        | Coccidioidomycosis                                               |
| B39*        | Histoplasmosis                                                   |
| B40*        | Blastomycosis                                                    |
| B41.0       | Pulmonary paracoccidioidomycosis                                 |
| B42.0       | Pulmonary sporotrichosis                                         |
| B44*        | Aspergillosis                                                    |
| B45.0       | Pulmonary cryptococcosis                                         |
| B46.0       | Pulmonary mucormycosis                                           |
| B58.3       | Pulmonary toxoplasmosis                                          |
| B59*        | Pneumocystosis                                                   |
| B67.1       | Echinococcus granulosus infection of lung                        |
| J10.0       | Influenza with pneumonia, influenza virus identified             |
| J11.0       | Influenza with pneumonia, virus not identified                   |
| J12*        | Viral pneumonia, not elsewhere classified                        |
| J13*        | Pneumonia due to Streptococcus pneumoniae                        |
| J14*        | Pneumonia due to Haemophilus influenzae                          |
| J15*        | Bacterial pneumonia not elsewhere classified                     |
| J16*        | Pneumonia due to other infectious organisms NEC                  |
| J17*        | Pneumonia in diseases classified elsewhere                       |
| J18*        | Pneumonia organism unspecified                                   |
| J85*        | Abscess of lung and mediastinum                                  |
| J86.0       | Pyothorax with fistula                                           |
| J86.9       | Pyothorax without fistula                                        |

### **Annex 3 : Read codes to be used to identify pneumonia**

| <b>Read Code</b> | <b>Read Term</b>                                            |
|------------------|-------------------------------------------------------------|
| A022200          | Salmonella pneumonia                                        |
| A054.00          | Amoebic lung abscess                                        |
| A10..00          | Primary tuberculous infection                               |
| A100.00          | Primary tuberculous complex                                 |
| A101.00          | Tuberculous pleurisy in primary progressive tuberculosis    |
| A10y.00          | Other primary progressive tuberculosis                      |
| A10z.00          | Primary tuberculous infection NOS                           |
| A11..00          | Pulmonary tuberculosis                                      |
| A11..11          | Lung tuberculosis                                           |
| A110.00          | Infiltrative lung tuberculosis                              |
| A111.00          | Nodular lung tuberculosis                                   |
| A112.00          | Tuberculosis of lung with cavitation                        |
| A113.00          | Tuberculosis of bronchus                                    |
| A114.00          | Tuberculous fibrosis of lung                                |
| A115.00          | Tuberculous bronchiectasis                                  |
| A116.00          | Tuberculous pneumonia                                       |
| A117.00          | Tuberculous pneumothorax                                    |
| A11y.00          | Other specified pulmonary tuberculosis                      |
| A11z.00          | Pulmonary tuberculosis NOS                                  |
| A12..00          | Other respiratory tuberculosis                              |
| A120.00          | Tuberculous pleurisy                                        |
| A120000          | Tuberculosis of pleura                                      |
| A120100          | Tuberculous empyema                                         |
| A120200          | Tuberculous hydrothorax                                     |
| A120z00          | Tuberculous pleurisy NOS                                    |
| A121.00          | Tuberculosis of intrathoracic lymph nodes                   |
| A121000          | Tuberculosis of hilar lymph nodes                           |
| A121100          | Tuberculosis of mediastinal lymph nodes                     |
| A121200          | Tuberculosis of tracheobronchial lymph nodes                |
| A121z00          | Tuberculosis of intrathoracic lymph nodes NOS               |
| A122.00          | Isolated tracheal or bronchial tuberculosis                 |
| A122000          | Isolated tracheal tuberculosis                              |
| A122100          | Isolated bronchial tuberculosis                             |
| A122z00          | Isolated tracheal or bronchial tuberculosis NOS             |
| A123.00          | Tuberculous laryngitis                                      |
| A124.00          | Resp TB bacteriologically and histologically confirmed      |
| A124000          | TB lung confirm sputum microscopy with or without culture   |
| A124100          | Tuberculosis of lung, confirmed by culture only             |
| A124200          | Tuberculosis of lung, confirmed histologically              |
| A124300          | Tuberculosis of lung, confirmed by unspecified means        |
| A124400          | TB intrathoracic lymph nodes confirm bact histologically    |
| A124500          | Tuberculosis of larynx, trachea & bronchus conf bact/hist'y |
| A124600          | Tuberculous pleurisy, conf bacteriologically/histologically |
| A124700          | Primary respiratory TB confirm bact and histologically      |
| A125.00          | Respiratory TB not confirmed bact or histologically         |
| A125000          | Tuberculosis of lung, bacteriologically & histolog'y neg    |
| A125100          | Tuberculosis lung bact and histological examin not done     |

|         |                                                             |
|---------|-------------------------------------------------------------|
| A125200 | Prim respiratory TB without mention of bact or hist confirm |
| A125X00 | Resp TB unspcf,w'out mention/bacterial or histol confrmtn   |
| A12y.00 | Other specified respiratory tuberculosis                    |
| A12y000 | Tuberculosis of mediastinum                                 |
| A12y100 | Tuberculosis of nasopharynx                                 |
| A12y200 | Tuberculosis of nasal septum                                |
| A12y300 | Tuberculosis of nasal sinus                                 |
| A12yz00 | Other specified respiratory tuberculosis NOS                |
| A18..00 | Miliary tuberculosis                                        |
| A180.00 | Acute miliary tuberculosis                                  |
| A180000 | Acute miliary tuberculosis of a single specified site       |
| A180100 | Acute miliary tuberculosis of multiple sites                |
| A18y.00 | Other specified miliary tuberculosis                        |
| A18z.00 | Miliary tuberculosis NOS                                    |
| A203.00 | Primary pneumonic plague                                    |
| A205.00 | Pneumonic plague, unspecified                               |
| A221.00 | Pulmonary anthrax                                           |
| A221.11 | Woolsorters' disease                                        |
| A310.00 | Pulmonary mycobacterial infection                           |
| A310000 | Pulmonary mycobacterium avium-intracellulare infection      |
| A391.00 | Pulmonary actinomycosis                                     |
| A39y000 | Pulmonary nocardiosis                                       |
| A54x400 | Herpes simplex pneumonia                                    |
| A551.00 | Postmeasles pneumonia                                       |
| A730.00 | Ornithosis with pneumonia                                   |
| A785000 | Cytomegaloviral pneumonitis                                 |
| A789300 | HIV disease resulting in Pneumocystis carinii pneumonia     |
| A789311 | HIV disease resulting in Pneumocystis jirovecii pneumonia   |
| AB24.00 | Candidiasis of lung                                         |
| AB24.11 | Pneumonia - candidal                                        |
| AB3..00 | Coccidioidomycosis                                          |
| AB30.00 | Primary pulmonary coccidioidomycosis                        |
| AB31.00 | Primary extrapulmonary coccidioidomycosis                   |
| AB32.00 | Coccidioidal meningitis                                     |
| AB33.00 | Other progressive coccidioidomycosis                        |
| AB33000 | Coccidioidal granuloma                                      |
| AB3z.00 | Coccidioidomycosis NOS                                      |
| AB4..00 | Histoplasmosis                                              |
| AB40.11 | American histoplasmosis                                     |
| AB40100 | Histoplasma capsulatum with meningitis                      |
| AB40200 | Histoplasma capsulatum with retinitis                       |
| AB40300 | Histoplasma capsulatum with pericarditis                    |
| AB40500 | Histoplasma capsulatum with pneumonia                       |
| AB40600 | Acute pulmonary histoplasmosis capsulati                    |
| AB40700 | Chronic pulmonary histoplasmosis capsulati                  |
| AB40800 | Disseminated histoplasmosis capsulati                       |
| AB41200 | Histoplasma duboisii with retinitis                         |
| AB41300 | Histoplasma duboisii with pericarditis                      |
| AB41400 | Histoplasma duboisii with endocarditis                      |
| AB41500 | Histoplasma duboisii with pneumonia                         |

|         |                                                              |
|---------|--------------------------------------------------------------|
| AB42.00 | Pulmonary histoplasmosis                                     |
| AB4z200 | Histoplasmosis with retinitis                                |
| AB4zz00 | Unspecified histoplasmosis NOS                               |
| AB50.00 | Blastomycosis                                                |
| AB50.13 | North American blastomycosis                                 |
| AB50000 | Cutaneous blastomycosis                                      |
| AB50100 | Primary pulmonary blastomycosis                              |
| AB50200 | Disseminated blastomycosis                                   |
| AB50300 | Blastomycosis liver                                          |
| AB50z00 | Blastomycosis NOS                                            |
| AB51.13 | South American blastomycosis                                 |
| AB52.11 | Keloidal blastomycosis                                       |
| AB62.00 | Chromoblastomycosis                                          |
| AB62100 | Phaeomycotic brain abscess                                   |
| AB62200 | Subcutaneous phaeomycotic abscess and cyst                   |
| AB62X00 | Chromomycosis, unspecified                                   |
| AB63.00 | Aspergillosis                                                |
| AB63000 | Invasive pulmonary aspergillosis                             |
| AB63100 | Tonsillar aspergillosis                                      |
| AB63200 | Disseminated aspergillosis                                   |
| AB63300 | Allergic bronchopulmonary aspergillosis                      |
| AB63400 | Pulmonary aspergillus disease                                |
| AB63500 | Aspergilloma                                                 |
| AB63600 | Aspergillus bronchitis                                       |
| AB63X00 | Aspergillosis, unspecified                                   |
| AB65000 | Pulmonary cryptococcosis                                     |
| AC21.00 | Lung echinococcus granulosus                                 |
| AD63.00 | Pneumocystosis                                               |
| AE00.00 | Late effects of respiratory tuberculosis                     |
| Ayu1000 | [X]Other resp tubercul,confirmd bacteriologicly+histologicly |
| Ayu1100 | [X]Resp tuberculos unspcfd,confirmd bacteriolog+histologicly |
| Ayu1300 | [X]Resp TB unspcf,w/out mention/bacterial or histol confrmtn |
| Ayu1800 | [X]Other miliary tuberculosis                                |
| Ayu1900 | [X]Miliary tuberculosis, unspecified                         |
| AyuEK00 | [X]Other forms of aspergillosis                              |
| AyuEU00 | [X]Other pulmonary aspergillosis                             |
| AyuJ400 | [X]Sequelae of respiratory and unspecified tuberculosis      |
| F501B00 | Chronic otitis externa due to aspergillosis                  |
| H20..00 | Viral pneumonia                                              |
| H20..11 | Chest infection - viral pneumonia                            |
| H200.00 | Pneumonia due to adenovirus                                  |
| H201.00 | Pneumonia due to respiratory syncytial virus                 |
| H202.00 | Pneumonia due to parainfluenza virus                         |
| H203.00 | Pneumonia due to human metapneumovirus                       |
| H20y.00 | Viral pneumonia NEC                                          |
| H20y000 | Severe acute respiratory syndrome                            |
| H20z.00 | Viral pneumonia NOS                                          |
| H21..00 | Lobar (pneumococcal) pneumonia                               |
| H21..11 | Chest infection - pneumococcal pneumonia                     |
| H22..00 | Other bacterial pneumonia                                    |

|         |                                                         |
|---------|---------------------------------------------------------|
| H22..11 | Chest infection - other bacterial pneumonia             |
| H220.00 | Pneumonia due to klebsiella pneumoniae                  |
| H221.00 | Pneumonia due to pseudomonas                            |
| H222.00 | Pneumonia due to haemophilus influenzae                 |
| H222.11 | Pneumonia due to haemophilus influenzae                 |
| H223.00 | Pneumonia due to streptococcus                          |
| H223000 | Pneumonia due to streptococcus, group B                 |
| H224.00 | Pneumonia due to staphylococcus                         |
| H22y.00 | Pneumonia due to other specified bacteria               |
| H22y000 | Pneumonia due to escherichia coli                       |
| H22y011 | E.coli pneumonia                                        |
| H22y100 | Pneumonia due to proteus                                |
| H22y200 | Pneumonia - Legionella                                  |
| H22yX00 | Pneumonia due to other aerobic gram-negative bacteria   |
| H22yz00 | Pneumonia due to bacteria NOS                           |
| H22z.00 | Bacterial pneumonia NOS                                 |
| H23..00 | Pneumonia due to other specified organisms              |
| H23..11 | Chest infection - pneumonia organism OS                 |
| H230.00 | Pneumonia due to Eaton's agent                          |
| H231.00 | Pneumonia due to mycoplasma pneumoniae                  |
| H232.00 | Pneumonia due to pleuropneumonia like organisms         |
| H233.00 | Chlamydial pneumonia                                    |
| H23z.00 | Pneumonia due to specified organism NOS                 |
| H24..00 | Pneumonia with infectious diseases EC                   |
| H24..11 | Chest infection with infectious disease EC              |
| H240.00 | Pneumonia with measles                                  |
| H241.00 | Pneumonia with cytomegalic inclusion disease            |
| H242.00 | Pneumonia with ornithosis                               |
| H243.00 | Pneumonia with whooping cough                           |
| H243.11 | Pneumonia with pertussis                                |
| H244.00 | Pneumonia with tularaemia                               |
| H246.00 | Pneumonia with aspergillosis                            |
| H247000 | Pneumonia with candidiasis                              |
| H247100 | Pneumonia with coccidioidomycosis                       |
| H247z00 | Pneumonia with systemic mycosis NOS                     |
| H24y.00 | Pneumonia with other infectious diseases EC             |
| H24y000 | Pneumonia with actinomycosis                            |
| H24y100 | Pneumonia with nocardiasis                              |
| H24y200 | Pneumonia with pneumocystis carinii                     |
| H24y300 | Pneumonia with Q-fever                                  |
| H24y400 | Pneumonia with salmonellosis                            |
| H24y500 | Pneumonia with toxoplasmosis                            |
| H24y600 | Pneumonia with typhoid fever                            |
| H24y700 | Pneumonia with varicella                                |
| H24yz00 | Pneumonia with other infectious diseases EC NOS         |
| H24z.00 | Pneumonia with infectious diseases EC NOS               |
| H25..00 | Bronchopneumonia due to unspecified organism            |
| H25..11 | Chest infection - unspecified bronchopneumonia          |
| H26..00 | Pneumonia due to unspecified organism                   |
| H26..11 | Chest infection - pneumonia due to unspecified organism |

|         |                                                          |
|---------|----------------------------------------------------------|
| H260.00 | Lobar pneumonia due to unspecified organism              |
| H260000 | Lung consolidation                                       |
| H261.00 | Basal pneumonia due to unspecified organism              |
| H262.00 | Postoperative pneumonia                                  |
| H263.00 | Pneumonitis, unspecified                                 |
| H27..11 |                                                          |
| H270.00 | Influenza with pneumonia                                 |
| H270.11 | Chest infection - influenza with pneumonia               |
| H270000 | Influenza with bronchopneumonia                          |
| H270100 | Influenza with pneumonia, influenza virus identified     |
| H270z00 | Influenza with pneumonia NOS                             |
| H28..00 | Atypical pneumonia                                       |
| H2B..00 | Community acquired pneumonia                             |
| H2C..00 | Hospital acquired pneumonia                              |
| H470.11 | Aspiration pneumonia                                     |
| H470312 | Aspiration pneumonia due to vomit                        |
| H471000 | Lipoid pneumonia (exogenous)                             |
| H501600 | Pyothorax                                                |
| H53..00 | Abscess of lung and mediastinum                          |
| H530.00 | Abscess of lung                                          |
| H530000 | Single lung abscess                                      |
| H530100 | Multiple lung abscess                                    |
| H530200 | Gangrenous pneumonia                                     |
| H530300 | Abscess of lung with pneumonia                           |
| H530z00 | Abscess of lung NOS                                      |
| H531.00 | Abscess of mediastinum                                   |
| H53z.00 | Abscess of lung and mediastinum NOS                      |
| H540000 | Hypostatic pneumonia                                     |
| H540100 | Hypostatic bronchopneumonia                              |
| H564.00 | Bronchiolitis obliterans organising pneumonia            |
| H564.11 | Cryptogenic organising pneumonia                         |
| H56y000 | Endogenous lipoid pneumonia                              |
| H56y100 | Interstitial pneumonia                                   |
| H571.00 | Rheumatic pneumonia                                      |
| Hyu0800 | [X]Other viral pneumonia                                 |
| Hyu0A00 | [X]Other bacterial pneumonia                             |
| Hyu0B00 | [X]Pneumonia due to other specified infectious organisms |
| Hyu0D00 | [X]Pneumonia in viral diseases classified elsewhere      |
| Hyu0H00 | [X]Other pneumonia, organism unspecified                 |
| SP13100 | Other aspiration pneumonia as a complication of care     |
